# Supplementary material for: Detection of Salmonella Pathogenicity Islands and Antimicrobial-Resistant Genes in Salmonella enterica Serovars Enteritidis and Typhimurium Isolated from Broiler Chickens
Source: MDPI journal article supplement (doi:10.3390/antibiotics13050458), 2024-05-16
Supplement: s1 [file s1]

# Supplementary Materials

**Table S1.** List of antibiotic resistance genes primers used in this study.

| Class               | Target gene   | Primer                               | Primer sequence (5' → 3')                          | Amplicon size (bp) | Annealing temp (°C) | References           |
|---------------------|---------------|--------------------------------------|----------------------------------------------------|--------------------|---------------------|----------------------|
| <b>Tetracycline</b> | <i>tet(A)</i> | TETA-F<br>TETA-R                     | GCGCTNTATGCGTTGATGCA<br>ACAGCCCGTCAGGAAATT         | 387                | 62                  | Jiang et al., 2013   |
|                     | <i>tet(O)</i> | TETO-F<br>TETO-R                     | ACGGARAGTTTATTGTATACC<br>TGGCGTATCTATAATGTTGAC     | 171                | 60                  | Aminov et al., 2001. |
|                     | <i>tet(X)</i> | TETX-F<br>TETX-R                     | CCGACACGGAAGTTGAAGAA<br>CCTTGGTGAGATGCCATTAGC      | 468                | 60                  | Aminov et al., 2001. |
|                     | <i>tet(P)</i> | TETP-F<br>TETP-R                     | CTTGGATTGCGGAAGAAGAG<br>ATATGCCCATTTAACCACGC       | 676                | 60                  | Hong et al., 2018    |
|                     | <i>tet(W)</i> | TETW-F<br>TETW-R                     | GAGAGCCTGCTATATGCCAGC<br>GGGCGTATCCACAATGTTAAC     | 168                | 50                  | Jiang et al., 2013   |
|                     | <i>tet(K)</i> | <i>tet(X)</i> -F<br><i>tet(X)</i> -R | TCGATAGGAACAGCAGTA<br>CAGCAGATCCTACTCCTT           | 169                | 61                  | Hong et al., 2018    |
| <b>Colistin</b>     | <i>mcr-1</i>  | mcr-1-F<br>mcr-1-R                   | TATCGCTATGTGCTAAAGCCTG<br>CGTCTGCAGCCACTGGG        | 1139               | 56                  | Jousset et al., 2019 |
|                     | <i>mcr-2</i>  | mcr-2-F<br>mcr-2-R                   | TATCGCTATGTGCTAAAGCCTG<br>AAAATACTGCGTGGCAGGTAGC   | 816                | 56                  | Jousset et al., 2019 |
|                     | <i>mcr-3</i>  | mcr-3-F<br>mcr-3-R                   | CAATCGTTAGTTACACAATGATGAAG<br>AACACATCTAGCAGGCCCTC | 676                | 56                  | Jousset et al., 2019 |
|                     | <i>mcr-4</i>  | mcr-4-F<br>mcr-4-R                   | ATCCTGCTGAAGCATTGATG<br>GCGCGCAGTTTCACC            | 405                | 56                  | Jousset et al., 2019 |
|                     | <i>mcr-5</i>  | mcr-5-F<br>mcr-5-R                   | GGTTGAGCGGCTATGAAC<br>GAATGTTGACGTCCTACTACGG       | 207                | 56                  | Jousset et al., 2019 |
| <b>Sulfonamide</b>  |               |                                      |                                                    |                    |                     |                      |
|                     | <i>sulI</i>   | sulI-F<br>sulI-R                     | CGCACCGGAAACATCGCTGCAC<br>TGAAGTCCGCCGCAAGGCTCG    | 163                | 63                  | Hong et al., 2018    |
|                     | <i>sulII</i>  | sulII-F                              | TCCGGTGAGGCCGGTATCTGG                              | 191                | 63                  | Hong et al., 2018    |

|                       |              |                      |                                                    |      |    |                      |
|-----------------------|--------------|----------------------|----------------------------------------------------|------|----|----------------------|
|                       |              | sulII-R              | CGGGAATGCCATCTGCCTTGAG                             |      |    |                      |
|                       | <i>suIII</i> | sulIII-F<br>sulIII-R | TCCGTT CAGCGAATTGGTGCAG<br>TTCGTT CACGCCTTACACCAGC | 128  | 61 | Hong et al., 2018    |
| <b>β-lactam</b>       |              |                      |                                                    |      |    |                      |
|                       | <i>ampC</i>  | AmpC -F<br>AmpC R    | GTGACCAGATACTGGCCACA<br>TTACTGTAGCGCCTCGAGGA       | 822  | 61 | Liu et a., 2018      |
|                       | <i>SHV</i>   | SHV-F<br>SHV-R       | CACTCAAGGATGTATTGT G<br>TTAGCGTTGCCAGTGCTCG        | 885  | 55 | Ramatla et al., 2022 |
|                       | <i>OXA</i>   | OXA-F<br>OXA -R      | ACACAATACATATCAACTTCGC<br>AGTGTGTTTAGAATGGTGATC    | 813  | 55 | Ramatla et al., 2022 |
|                       | <i>CARB</i>  | CARB-F<br>CARB-R     | CAAGTACTTTYAAAACAATAGC<br>GCTGTAATACTCCKAGCAC      | 534  | 46 | Jiang et al., 2013   |
|                       | <i>TEM</i>   | TEM-F<br>TEM-R       | TTC TTG AAG ACG AAA GGG C<br>ACGCTCAGTGGAACGAAAAC  | 1150 | 55 | Ramatla et al., 2022 |
| <b>Aminoglycoside</b> |              |                      |                                                    |      |    |                      |
|                       | <i>strA</i>  | strA-F<br>strA-R     | CTTGGTGATAACGGCAATTC<br>CCAATCGCAGATAGAAGGC        | 548  | 55 | Hong et al., 2018    |
|                       | <i>strB</i>  | strB-F<br>strB-R     | ATCGTCAAGGGATTGAAACC<br>GGATCGTAGAACATATTGGC       | 509  | 56 | Hong et al., 2018    |
|                       | <i>aadA</i>  | aadA-F<br>aadA-R     | ATCCTTCGGCGCGATTTTG<br>GCAGCGCAATGACATTCTTG        | 283  | 56 | Hong et al., 2018    |
|                       | <i>aadE</i>  | aadE-F<br>aadE-r     | ATGGAATTATTCCCACCTGA<br>TCAAAACCCCTATTAAAGCC       | 386  | 50 | Hong et al., 2018    |

## Supplementary References

- 1 Sun W, Qian X, Gu J, Wang XJ, Duan ML. Mechanism and effect of temperature on variations in antibiotic resistance genes during anaerobic digestion of dairy manure. *Scientific reports*. 2016;6(1):30237.
- 2 Jiang L, Hu X, Xu T, Zhang H, Sheng D, Yin D. Prevalence of antibiotic resistance genes and their relationship with antibiotics in the Huangpu River and the drinking water sources, Shanghai, China. *Science of the Total Environment*. 2013;458:267-72.
- 3 Hong B, Ba Y, Niu L, Lou F, Zhang Z, Liu H, Pan Y, Zhao Y. A comprehensive research on antibiotic resistance genes in microbiota of aquatic animals. *Frontiers in Microbiology*. 2018;9:1617.
- 4 Ramatla T, Mileng K, Ndou R, Mphuti N, Syakalima M, Lekota KE, Thekisoe OM. Molecular detection of integrons, colistin and  $\beta$ -lactamase resistant genes in *Salmonella enterica* serovars enteritidis and typhimurium isolated from chickens and rats inhabiting poultry farms. *Microorganisms*. 2022;10(2):313.
- 5 Gundran RS, Cardenio PA, Villanueva MA, Sison FB, Benigno CC, Kreausukon K, Pichpol D, Punyapornwithaya V. Prevalence and distribution of bla CTX-M, bla SHV, bla TEM genes in extended-spectrum  $\beta$ -lactamase-producing *E. coli* isolates from broiler farms in the Philippines. *BMC veterinary research*. 2019;15:1-8.
- 6 Liu G, Ding L, Han B, Piepers S, Naqvi SA, Barkema HW, Ali T, De Vliegher S, Xu S, Gao J. Characteristics of *Escherichia coli* isolated from bovine mastitis exposed to subminimum inhibitory concentrations of cefalotin or ceftazidime. *BioMed Research International*. 2018;2018.
- 7 Xu J, Xu Y, Wang H, Guo C, Qiu H, He Y, Zhang Y, Li X, Meng W. Occurrence of antibiotics and antibiotic resistance genes in a sewage treatment plant and its effluent-receiving river. *Chemosphere*. 2015;119:1379-85.
